# Supplementary material
Source: PubMed Central journal article supplement (PMC4976744)
Supplement: Supplementary_Material_459.pdf [file Supplementary_Material_459.pdf]

**Supplementary Table 1.** Summary of demographic data, neuropathology and experimental results of human subjects

| Subject  | Race (Gender) | Brain area       | Age (years) | HD Vonsattel grade | Other pathology                              | Cause of death | PMI  |
|----------|---------------|------------------|-------------|--------------------|----------------------------------------------|----------------|------|
| Non-HD-1 | Caucasian (F) | Frontal cortex   | 79          | n.a.               | Depression                                   | Drug overdose  | 14 h |
| Non-HD-2 | Caucasian (F) | Frontal cortex   | 77          | n.a.               | Lung disease/HBP/<br>Arthritis/Breast cancer | ASCVD          | 8 h  |
| HD-1     | Caucasian (F) | Frontal cortex   | 82          | n.d.               | Senile cerebral disease                      | Complications  | 6 h  |
| HD-2     | Caucasian (F) | Frontal cortex   | 78          | III                | Senile cerebral disease                      | Complications  | 2 h  |
| Non-HD-3 | Caucasian (M) | Caudate nucleus  | 58          | n.a.               | n.d.                                         | n.d.           | 9 h  |
| Non-HD-4 | Caucasian (F) | Caudate nucleus  | 53          | n.a.               | HBP/Asthma                                   | HASCVD         | 15 h |
| HD-3     | Caucasian (M) | Caudate nucleus  | 43          | n.d.               | n.d.                                         | Complications  | 10 h |
| HD-4     | Caucasian (M) | Substantia nigra | 58          | n.d.               | n.d.                                         | ASCVD          | 17 h |

F, female; M, male; n.a., not applicable; n.d., not determined; PMI, post-mortem interval; HBP, high blood pressure; ASCVD, arteriosclerotic cardiovascular disease; HASCVD, hypertensive arteriosclerotic cardiovascular disease.

**Supplementary Table 2.** Relative mRNA levels of human and mouse HTT in brain cortex and the isolated brain capillaries (BCs) of R6/2 HD mice, the wild-type (WT) controls, and C57BL/6 (B6) mice.

|                 | R6/2      | WT        | B6        |
|-----------------|-----------|-----------|-----------|
| Mouse HTT       |           |           |           |
| BCs (n=2-3)     | 4.81±0.53 | 2.21±0.36 | 2.81±0.87 |
| Cortex (n=6-11) | 6.40±0.69 | 6.56±0.50 | 6.42±0.88 |
| Human HTT       |           |           |           |
| BCs (n=2-3)     | 8.66±1.16 | ND        | ND        |
| Cortex (n=6)    | 4.32±0.60 | ND        | ND        |

**Methods for Supplementary Table 2.** Brain capillaries were isolated from male and female R6/2 and wild-type (WT) mice of 12 weeks old or B6 mice of 6 weeks old (5-6 animals in each preparation) by the methods described in the article. The cDNA (1  $\mu$ L) was mixed with 7  $\mu$ L of DEPC-treated sterile deionized distilled water, 10  $\mu$ L of Power SYBR Green PCR Master Mix (Applied Biosystems, Warrington, UK) and 0.5  $\mu$ M forward and 0.5  $\mu$ M reverse primers: mouse HTT forward 5'-CTCAGAAGTGCAGGCCTTACCT-3' or reverse 5'-GATTCCTCCGGTCTTTTGCTT-3'; human HTT forward 5'-GCCGCTCAGGTTCTGCTTT-3' or reverse 5'-AAGGCCTTCATCAGCTTTTCC-3'. Quantitative RT-PCR was conducted as described in the text. Relative expression was calculated by  $2^{-\Delta Ct} \times 10^4$ .  $\Delta Ct$  is the relative quantity of Htt mRNA normalized to Gapdh mRNA. Data are given as mean±SEM of several independent preparations as indicated in the table. For BCs, each preparation was from 5-6 animals. ND, not detectable.

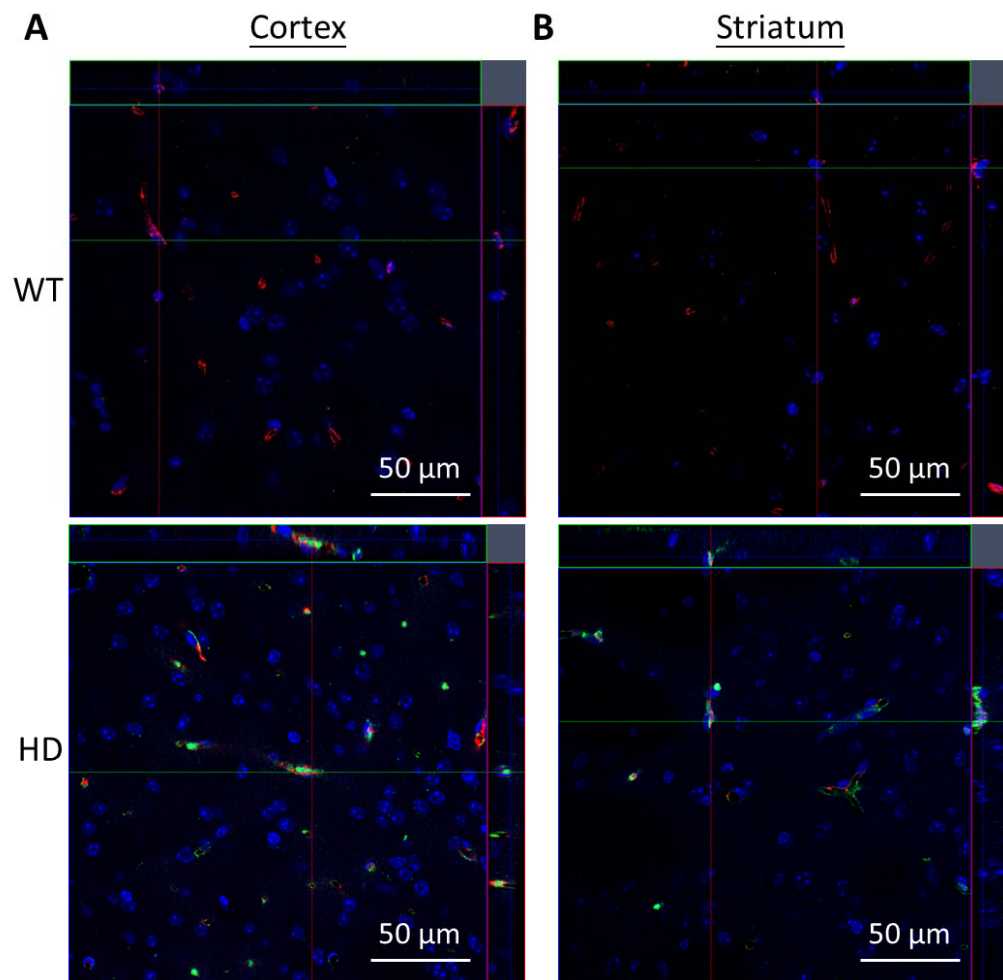

**Supplementary Figure 1.** Orthogonal views of the same imaging fields of the cortex (A) and striatum (B) shown in Figure 1. Images were taken from the z-section plane indicated by the blue line. The nuclear distribution of the p65 subunit of NF-κB is identified using immunostaining of p65 (green), CD31 (red) positive brain capillary endothelial cells, and nuclei (blue). The images were acquired at 40× magnification on an LSM 880 confocal microscope (Zeiss, Jena, Germany). Scale bars indicate 50 μm.

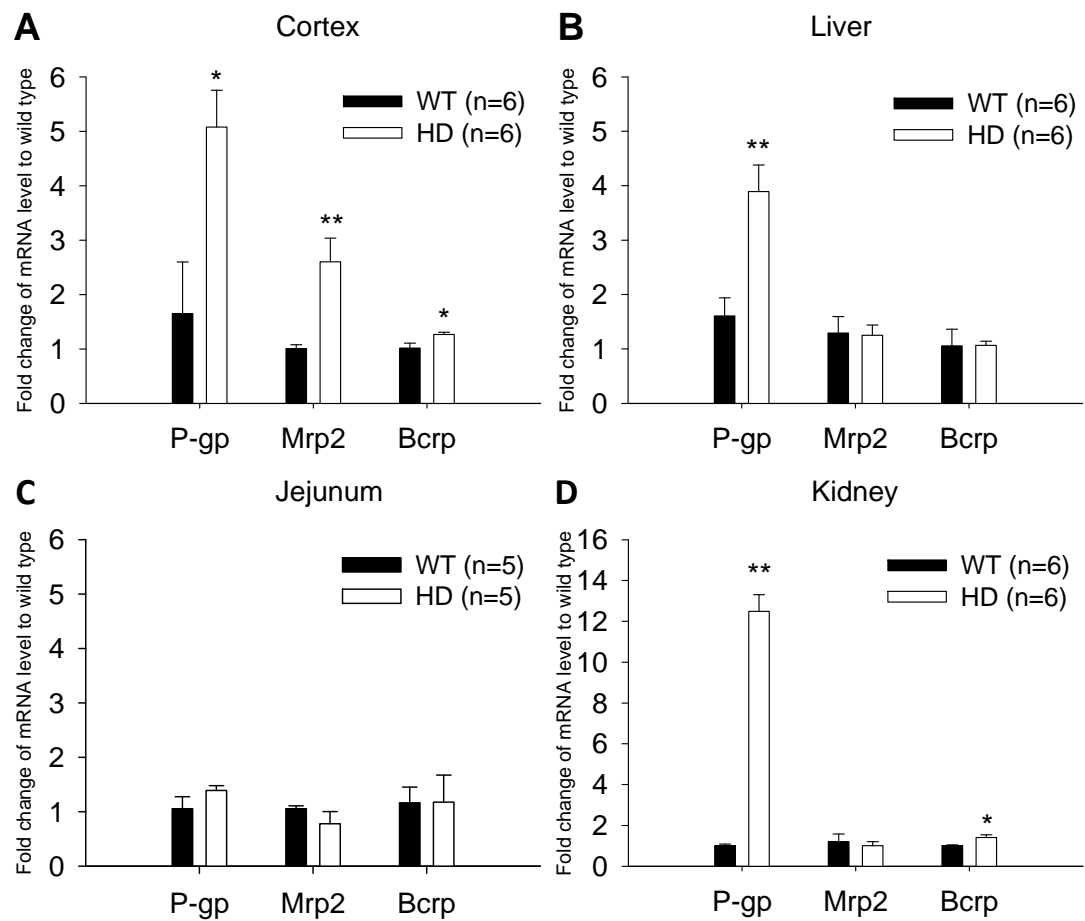

**Supplementary Figure 2.** mRNA levels of P-gp, Mrp2, and Bcrp in the cerebral cortex (A), liver (B), jejunum (C), and kidney (D) of male R6/2 HD mice at 12 weeks of age (white bars), compared to age-matched wild-type (WT) controls (black bars). Relative expression was calculated by  $2^{-\Delta\Delta C_t}$ .  $\Delta\Delta C_t$  value was obtained by subtracting the mean  $\Delta C_t$  value of WT controls from the individual  $\Delta C_t$  value, the relative quantity of P-gp, Mrp2, or Bcrp mRNA normalized to Gapdh mRNA. The data are given as the mean $\pm$ SEM of five to six animals. A fold change greater than 1 indicates up-regulation and a fold change less than 1 indicates down-regulation. (\*,  $P < 0.05$ ; \*\*,  $P < 0.01$  compared to WT mice).

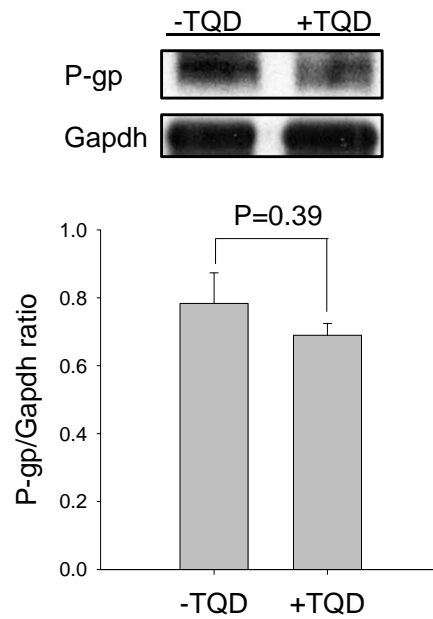

**Supplementary Figure 3.** Western blotting and the quantification results of P-gp in the membrane fractions isolated from the whole brains of the WT (B6CBAFI/J) mice 2 hours after an intravenous injection of vehicle (2.5% aqueous dextrose solution; -TQD group) or 6 mg/kg tariquidar (TQD) (+TQD group). Tariquidar was freshly prepared in 2.5% aqueous dextrose solution. The quantitative results are presented as the mean $\pm$ SEM of three mice.
